# Supplementary material for: Detecting localised prostate cancer using radiomic features in PSMA PET and multiparametric MRI for biologically targeted radiation therapy
Source: Springer Nature journal article supplement (doi:10.1186/s13550-023-00984-5), 2023-04-26
Supplement: MOESM1 [file 25285748]

## Supplementary Tables

**Table S1:** PET/CT acquisition details. TOF = time of flight, PSF = point spread function, OSEM = ordered-subset expectation maximization. Note the Gaussian filter kernel size was not available (n/a) in the DICOM header for GE scanners.

| Patient | PET/CT scanner          | Reconstruction method | Gaussian filter kernel size (mm) | Time of bed positions (min) | PET voxel size (mm <sup>3</sup> ) | CT voxel size (mm <sup>3</sup> ) | Injected Activity (Mbg) | PET uptake time (mins) |
|---------|-------------------------|-----------------------|----------------------------------|-----------------------------|-----------------------------------|----------------------------------|-------------------------|------------------------|
| 11      | GE 690 with TOF         | VPFXS                 | n/a                              | 3                           | 2.86 x 2.86 x 3.27                | 1.07 x 1.07 x 3.27               | 118                     | 32                     |
| 12      | GE 690 with TOF         | VPFXS                 | n/a                              | 3                           | 2.86 x 2.86 x 3.27                | 1.07 x 1.07 x 3.27               | 98                      | 60                     |
| 20      | Siemens Biograph 64     | PSF 3i21s             | 5                                | 3.5                         | 3.93 x 3.93 x 3.00                | 1.07 x 1.07 x 3.00               | 105                     | 54                     |
| 26      | Siemens Biograph 64     | PSF 3i21s             | 5                                | 3                           | 3.93 x 3.93 x 3.00                | 1.07 x 1.07 x 3.00               | 128                     | 50                     |
| 34      | Siemens Biograph 16     | PSF 3i14s             | 8                                | 3                           | 4.07 x 4.07 x 3.00                | 0.98 x 0.98 x 2.00               | 146                     | 72                     |
| 46      | GE 710 with TOF         | VPFXS                 | n/a                              | 2                           | 2.86 x 2.86 x 3.27                | 1.07 x 1.07 x 3.27               | 196                     | 59                     |
| 51      | GE 710 with TOF         | VPFXS                 | n/a                              | 2                           | 2.86 x 2.86 x 3.27                | 1.07 x 1.07 x 3.27               | 219                     | 54                     |
| 53      | Siemens Biograph 20 mCT | OSEM 3D+TOF 2i21s     | 7                                | 3.5                         | 4.07 x 4.07 x 3.00                | 0.98 x 0.98 x 2.00               | 181                     | 57                     |
| 54      | GE 710 with TOF         | VPFXS                 | n/a                              | 2                           | 2.86 x 2.86 x 3.27                | 1.07 x 1.07 x 3.27               | 240                     | 49                     |
| 55      | GE 710 with TOF         | VPFXS                 | n/a                              | 2.5                         | 2.86 x 2.86 x 3.27                | 1.07 x 1.07 x 3.27               | 194                     | 48                     |
| 56      | GE 710 with TOF         | VPFXS                 | n/a                              | 2.5                         | 2.86 x 2.86 x 3.27                | 1.07 x 1.07 x 3.27               | 153                     | 58                     |
| 58      | GE 710 with TOF         | VPFXS                 | n/a                              | 3.5                         | 2.86 x 2.86 x 3.27                | 1.07 x 1.07 x 3.27               | 105                     | 72                     |
| 59      | GE 690 with TOF         | VPFXS                 | n/a                              | 3.5                         | 2.86 x 2.86 x 3.27                | 1.07 x 1.07 x 3.27               | 139                     | 74                     |
| 60      | GE 690 with TOF         | VPFXS                 | n/a                              | 2.5                         | 2.86 x 2.86 x 3.27                | 1.07 x 1.07 x 3.27               | 157                     | 46                     |
| 62      | GE 710 with TOF         | VPFXS                 | n/a                              | 4                           | 2.86 x 2.86 x 3.27                | 1.07 x 1.07 x 3.27               | 109                     | 60                     |
| 64      | GE 690 with TOF         | VPFXS                 | n/a                              | 2                           | 2.86 x 2.86 x 3.27                | 1.07 x 1.07 x 3.27               | 197                     | 48                     |
| 65      | Siemens Biograph 16     | PSF 3i14s             | 8                                | 2                           | 4.07 x 4.07 x 3.00                | 0.98 x 0.98 x 2.00               | 95                      | 71                     |
| 66      | GE 710 with TOF         | VPFXS                 | n/a                              | 3.5                         | 2.86 x 2.86 x 3.27                | 1.07 x 1.07 x 3.27               | 104                     | 48                     |
| 68      | GE 690 with TOF         | VPFXS                 | n/a                              | 4                           | 2.86 x 2.86 x 3.27                | 1.07 x 1.07 x 3.27               | 79                      | 53                     |

**Table S2:** Spearman correlation coefficients between PET SUV and MRI parameters.

|                | LG     |       |        |        |        | HG     |       |        |        |       | Overall |       |        |        |       |
|----------------|--------|-------|--------|--------|--------|--------|-------|--------|--------|-------|---------|-------|--------|--------|-------|
|                | Mean   | SD    | Median | Min    | Max    | Mean   | SD    | Median | Min    | Max   | Mean    | SD    | Median | Min    | Max   |
| <b>T2w</b>     | -0.182 | 0.187 | -0.140 | -0.520 | 0.110  | -0.063 | 0.167 | -0.045 | -0.340 | 0.130 | -0.119  | 0.182 | -0.080 | -0.520 | 0.130 |
| <b>ADC</b>     | -0.236 | 0.163 | -0.160 | -0.540 | -0.050 | -0.184 | 0.341 | -0.155 | -0.730 | 0.260 | -0.208  | 0.266 | -0.160 | -0.730 | 0.260 |
| <b>IRE</b>     | 0.340  | 0.214 | 0.370  | 0.010  | 0.620  | 0.501  | 0.277 | 0.615  | 0.090  | 0.820 | 0.425   | 0.256 | 0.450  | 0.010  | 0.820 |
| <b>ME</b>      | 0.410  | 0.207 | 0.380  | 0.030  | 0.690  | 0.504  | 0.264 | 0.605  | -0.060 | 0.750 | 0.459   | 0.237 | 0.550  | -0.060 | 0.750 |
| <b>TTP</b>     | -0.202 | 0.231 | -0.180 | -0.540 | 0.100  | -0.358 | 0.310 | -0.360 | -0.760 | 0.000 | -0.284  | 0.280 | -0.180 | -0.760 | 0.100 |
| <b>Ktrans</b>  | 0.386  | 0.225 | 0.430  | 0.040  | 0.650  | 0.546  | 0.233 | 0.660  | 0.180  | 0.780 | 0.470   | 0.237 | 0.500  | 0.040  | 0.780 |
| <b>Ve</b>      | 0.239  | 0.222 | 0.150  | -0.130 | 0.540  | 0.151  | 0.248 | 0.145  | -0.220 | 0.580 | 0.193   | 0.234 | 0.150  | -0.220 | 0.580 |
| <b>iAUGC60</b> | 0.326  | 0.249 | 0.350  | 0.020  | 0.660  | 0.552  | 0.218 | 0.675  | 0.230  | 0.750 | 0.445   | 0.254 | 0.410  | 0.020  | 0.750 |
